# Supplementary material for: DDX5 deficiency drives non-canonical NF-κB activation and NRF2 expression, influencing sorafenib response and hepatocellular carcinoma progression
Source: PubMed Central journal article supplement (PMC11315975; doi:10.1038/s41419-024-06977-z), 2024-08-09

Immunoblotting protocol is included under Supplementary Information section.

**Please note:** SDS PAGE analyses of lysates used for immunoblotting utilized prestained MW markers (Precision Plus Protein Dual Color Standards, #1610374, from BIO-RAD).

Following transfer, nitrocellulose membranes were cropped according to migration of prestained MW markers.

Fig1C

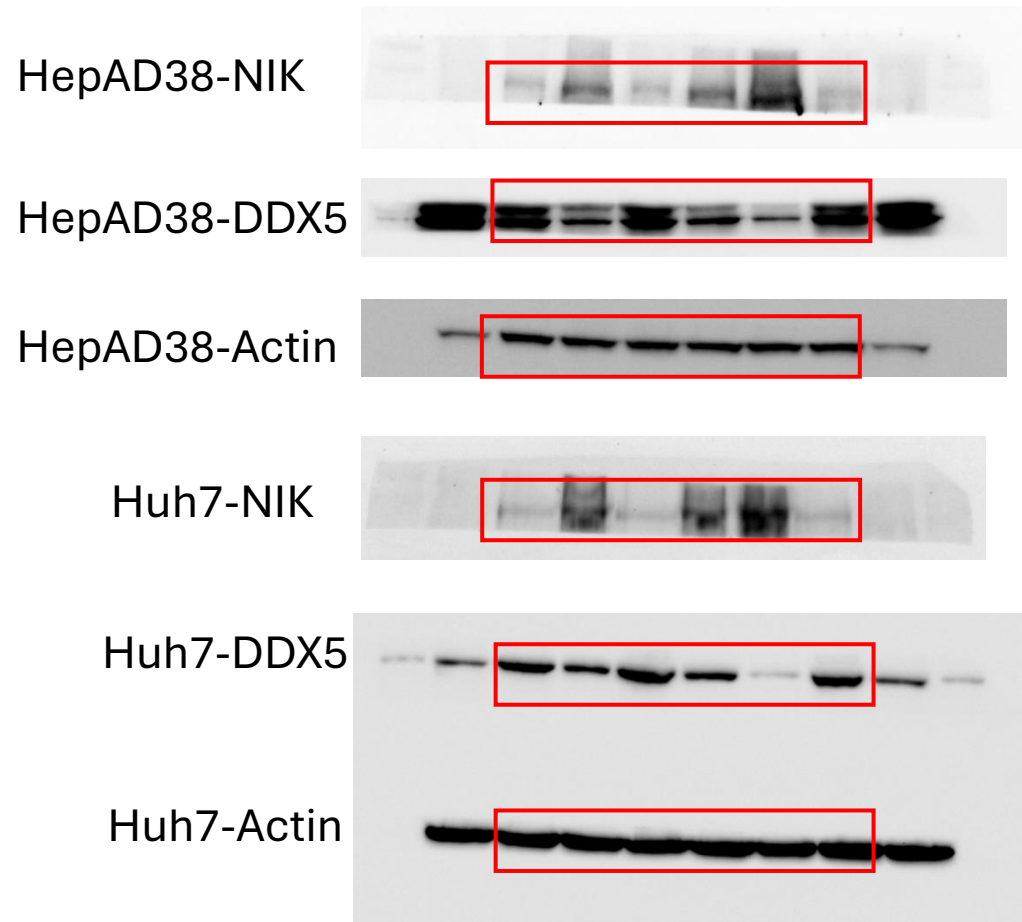



Fig3A

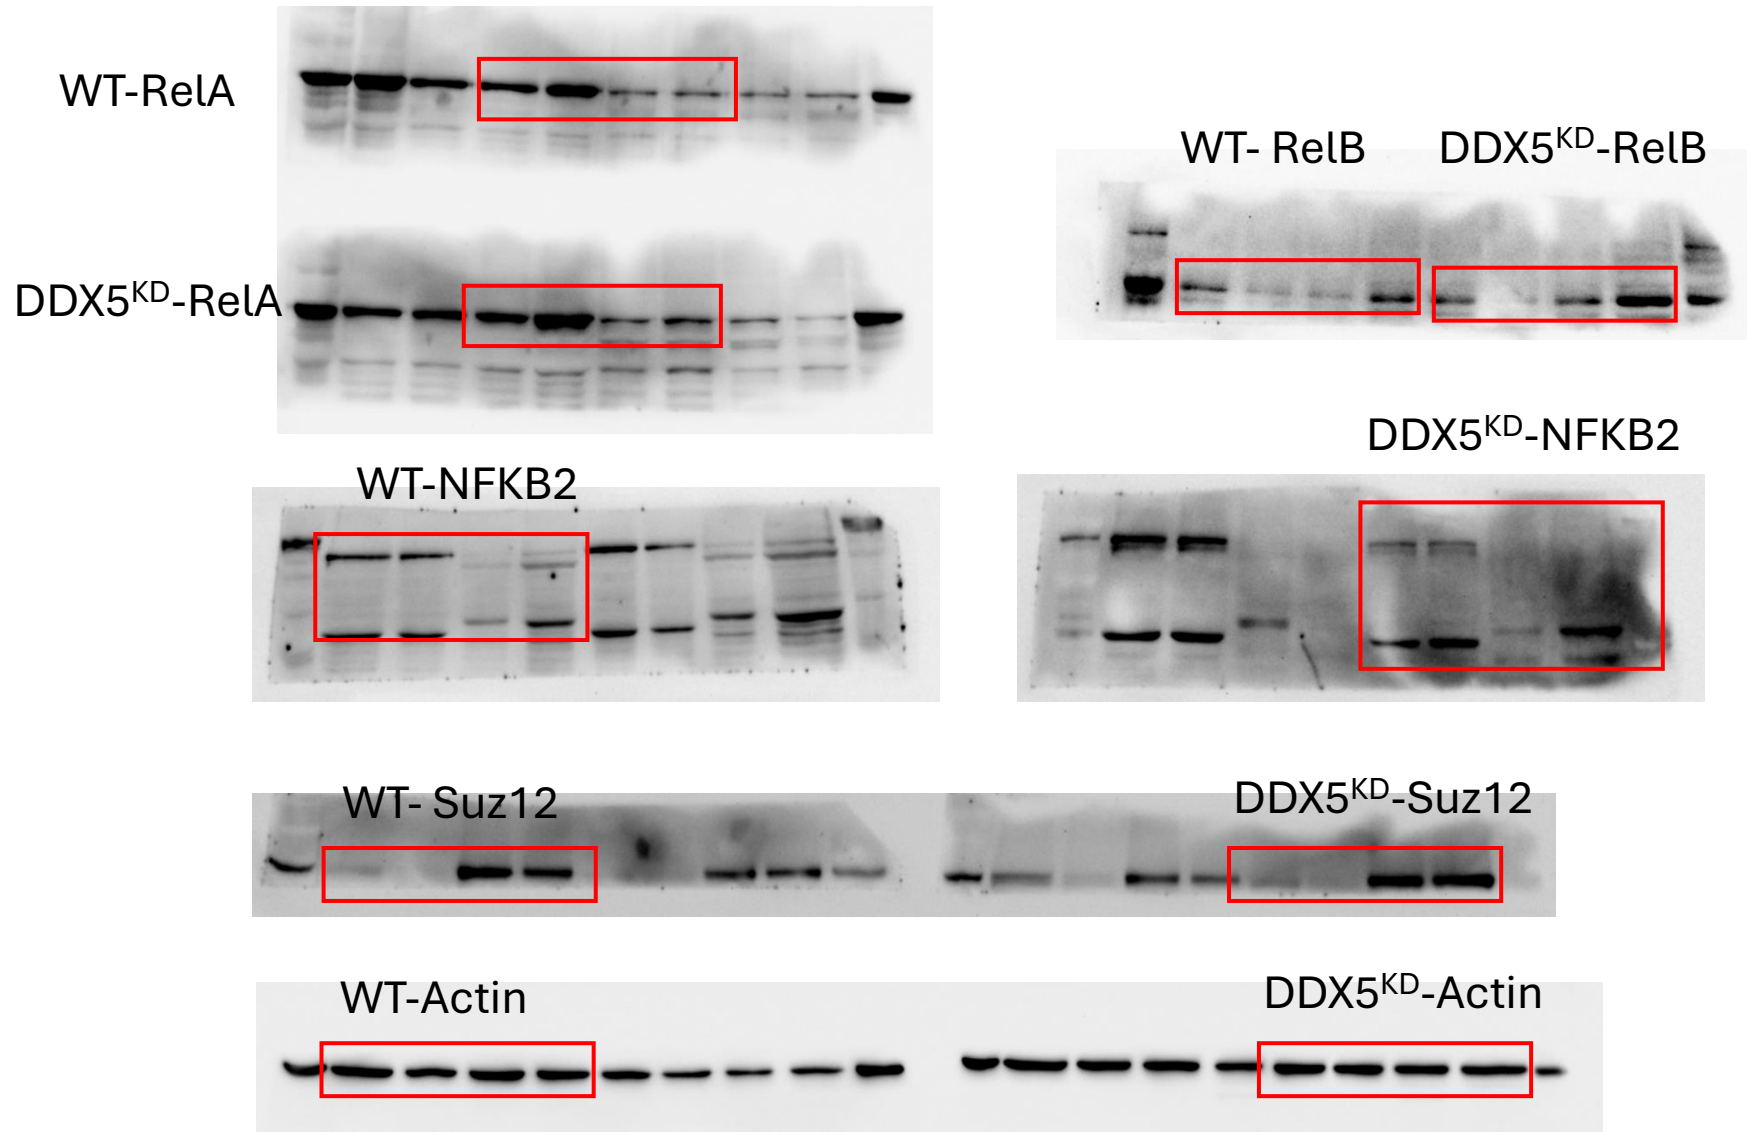

Fig3B

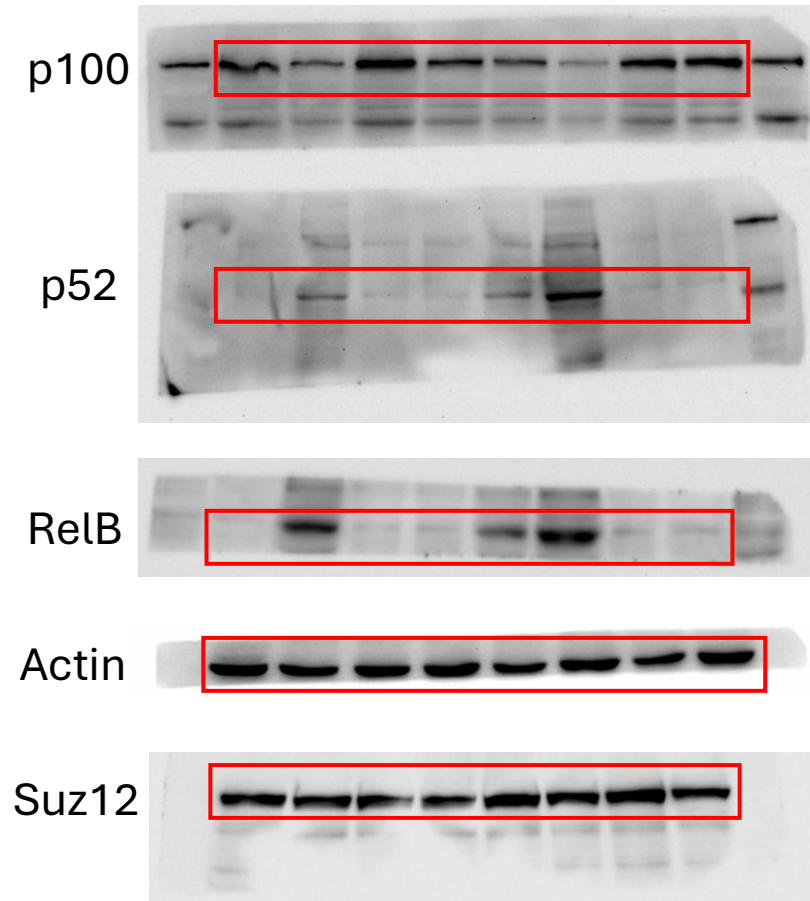

Fig3C

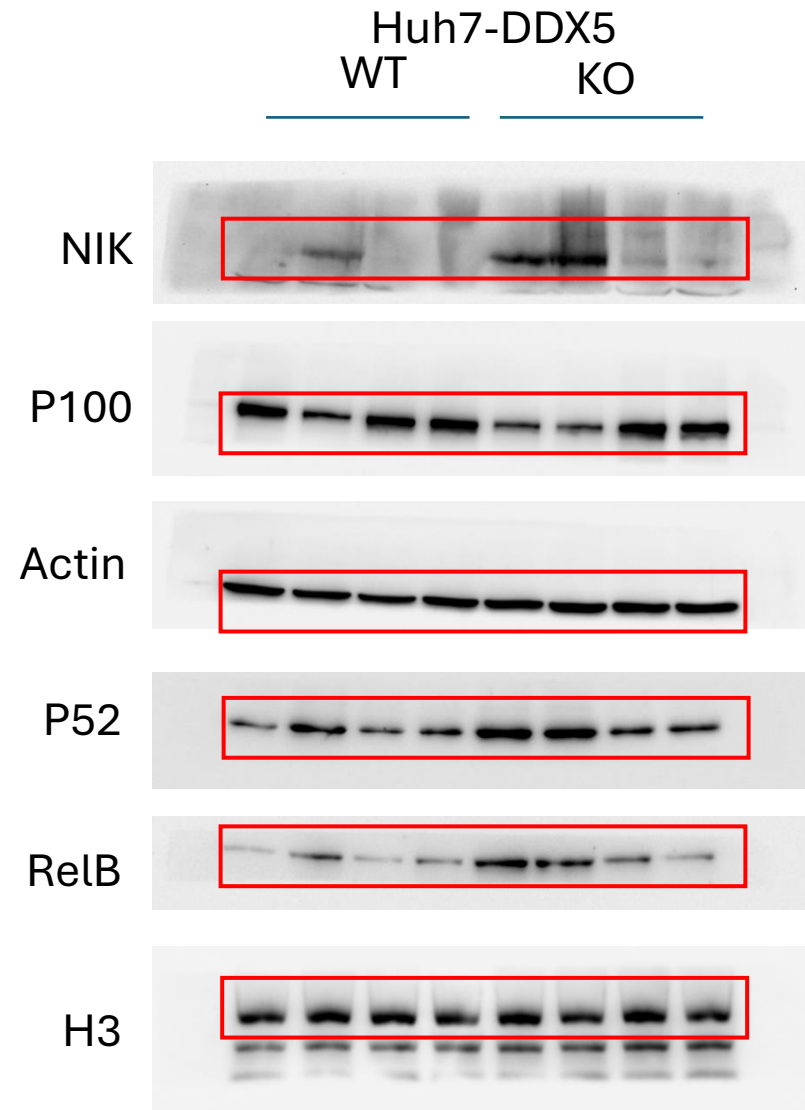

Fig4B

HepAD38-NRF2

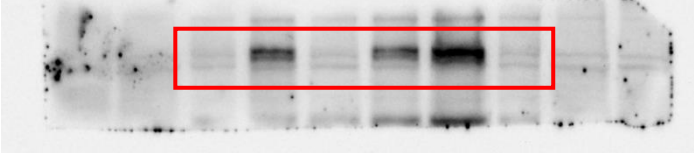

HepAD38-Suz12

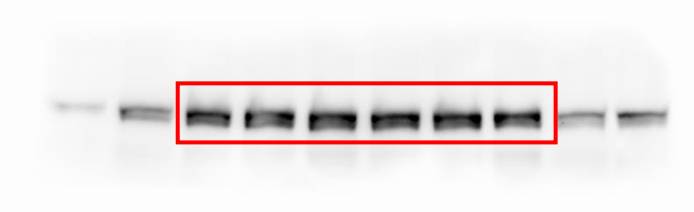

Huh7-NRF2

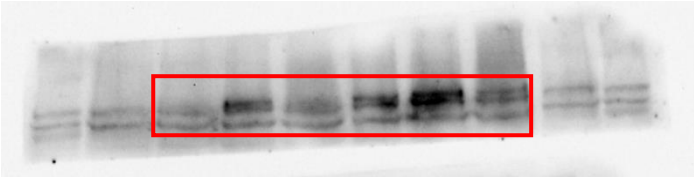

Huh7-SUZ12

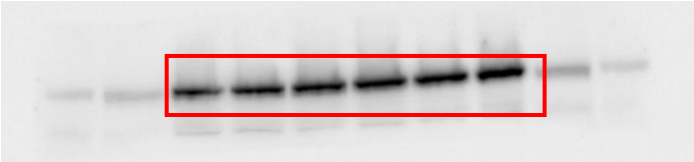

Fig4F

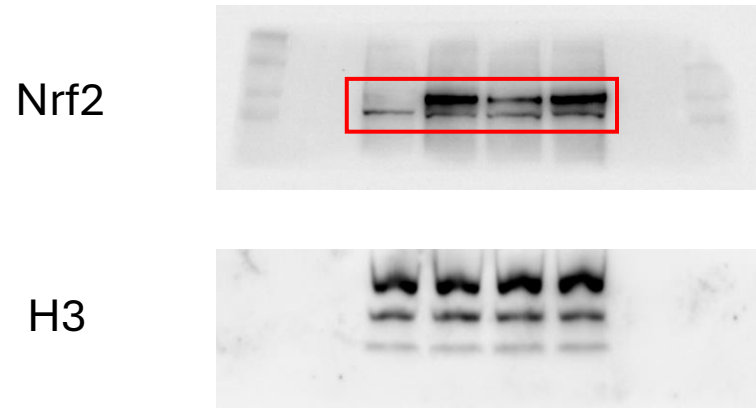



Fig5A

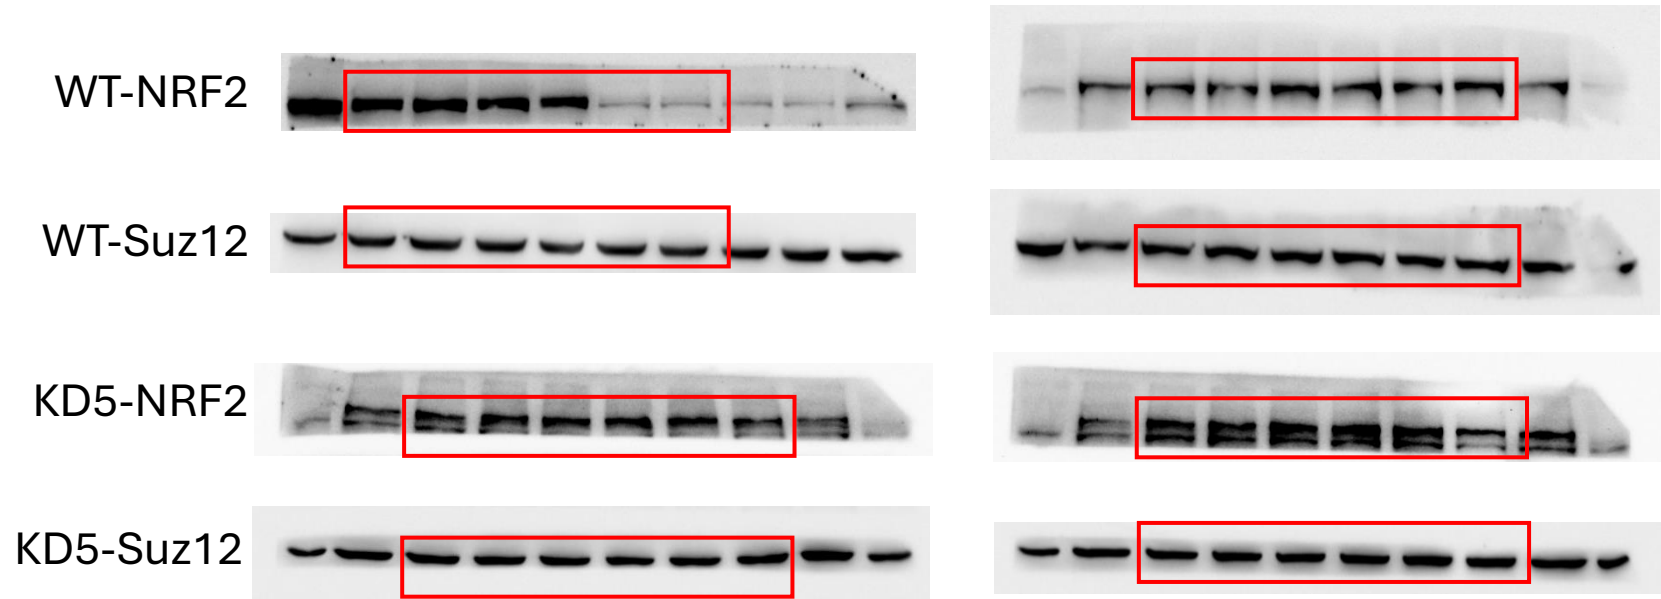

Fig5B

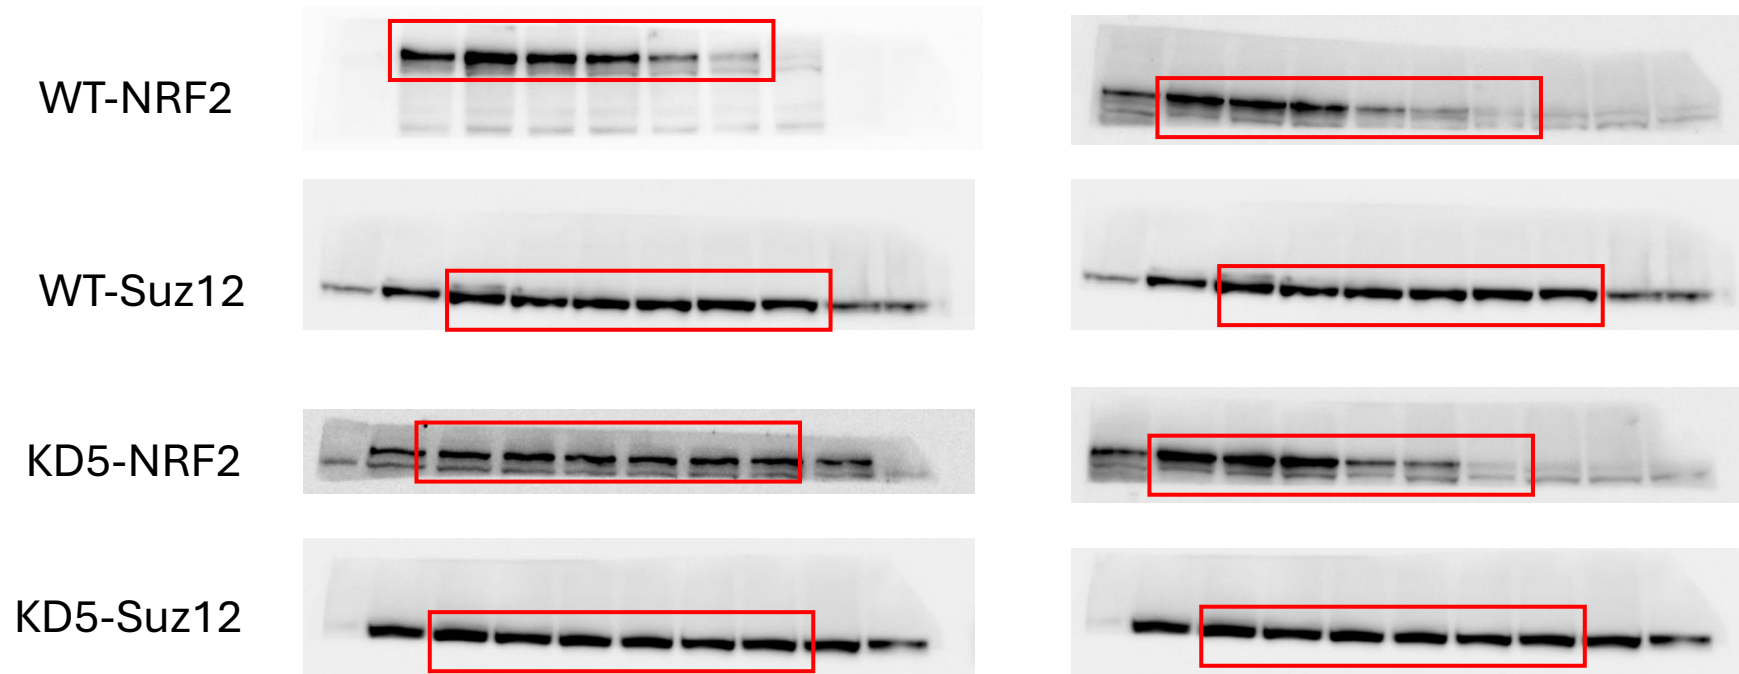

Fig5C

P62

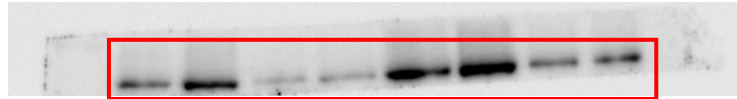

Keap1

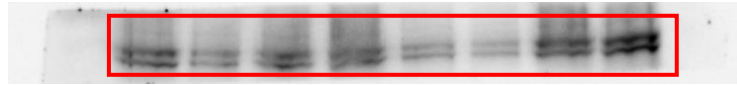

Actin

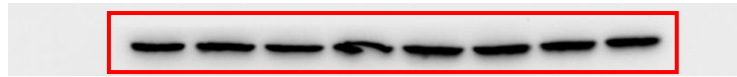

NRF2

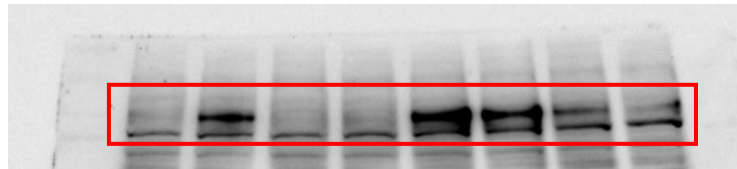

H3

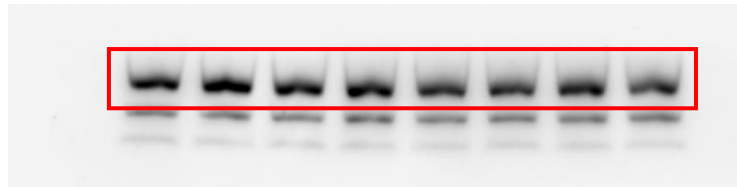

Fig6G

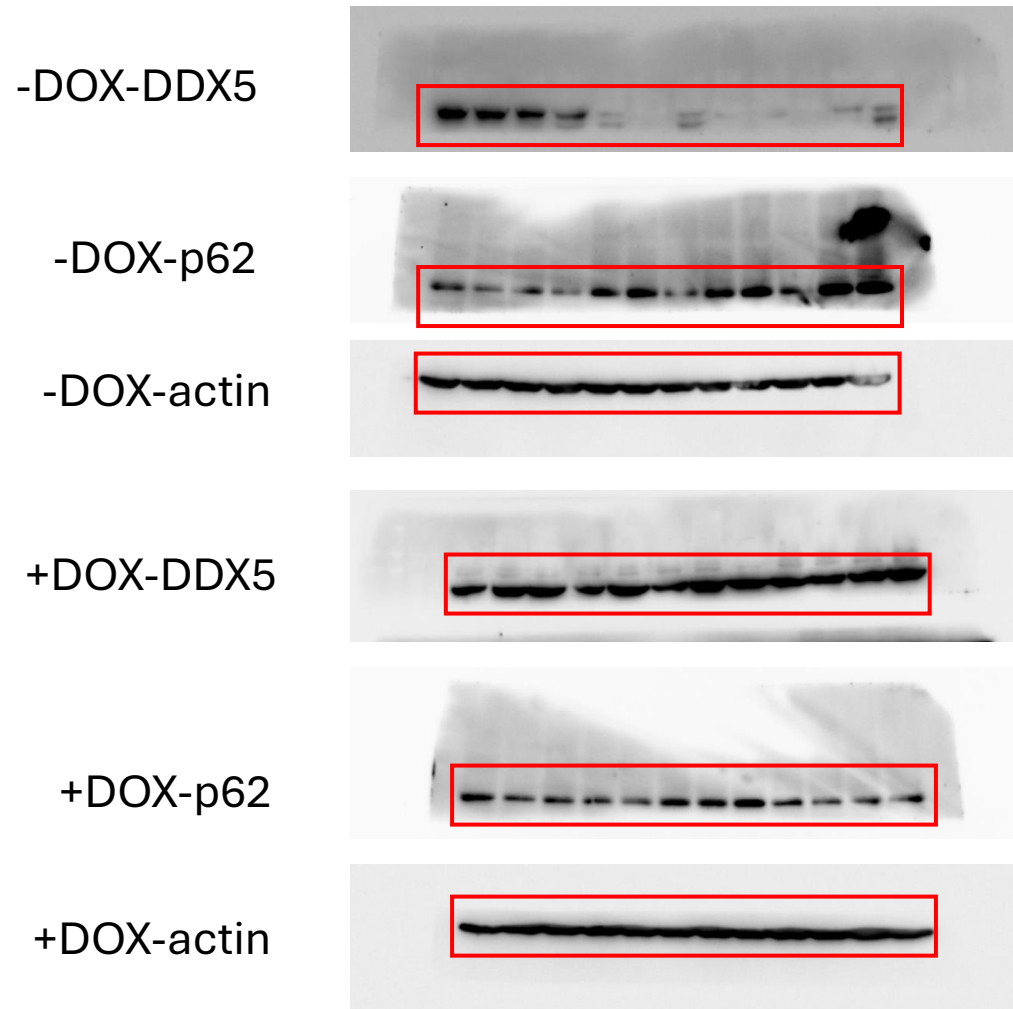

Fig7B

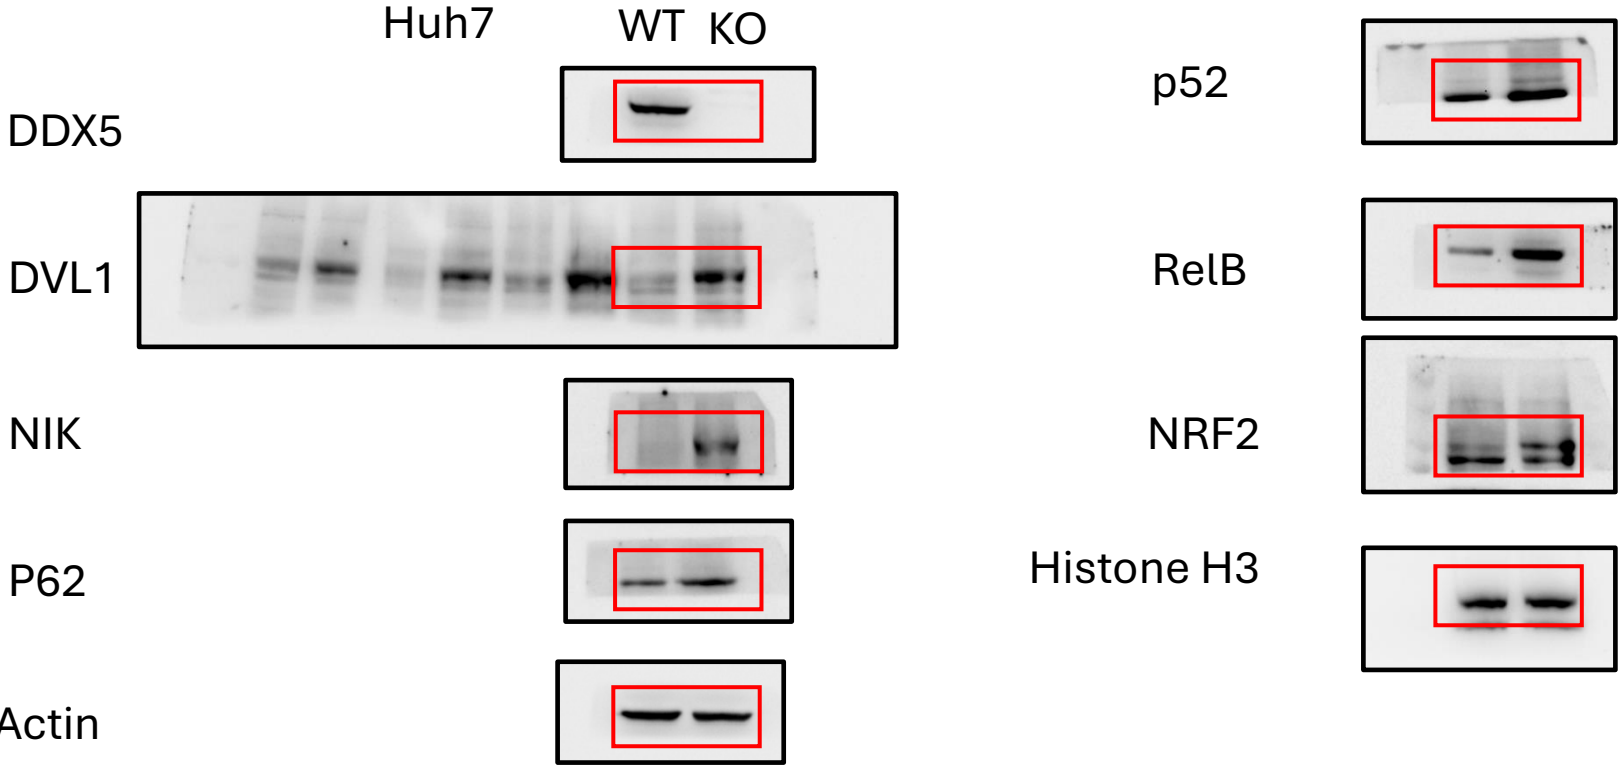

FigS3

SOR-10uM-24H

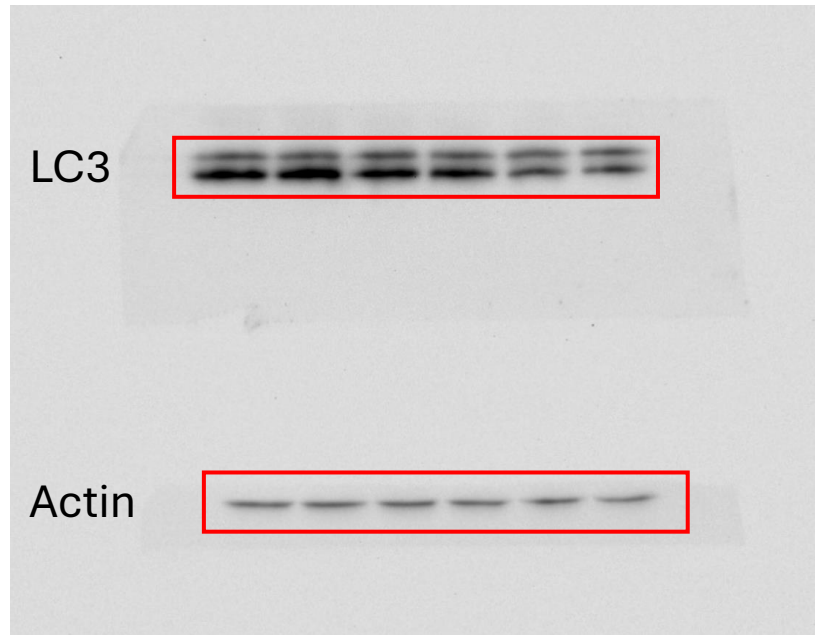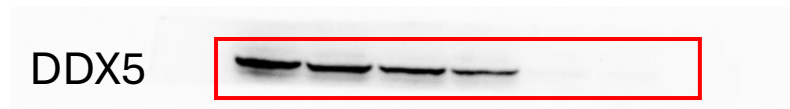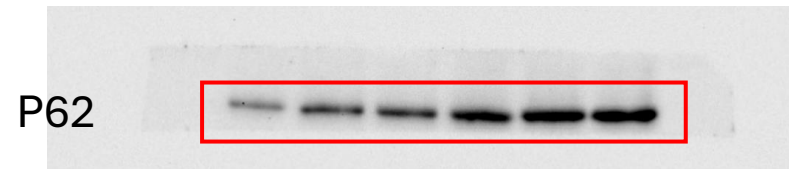

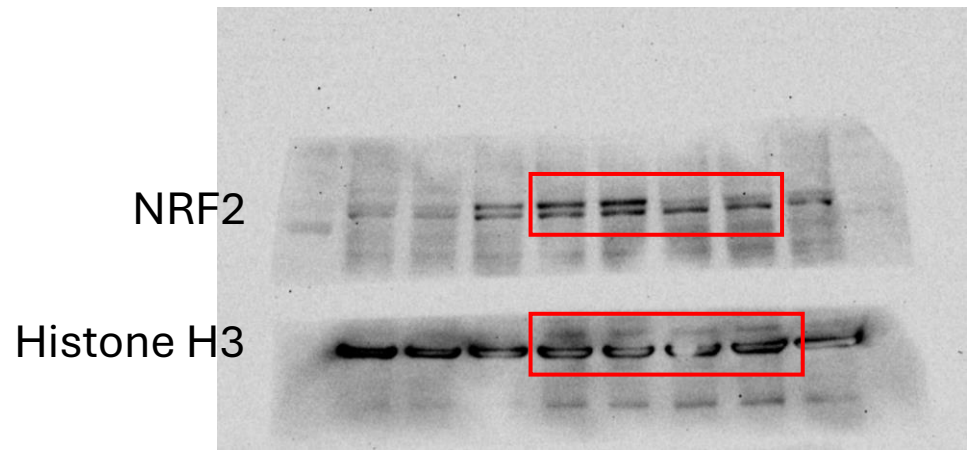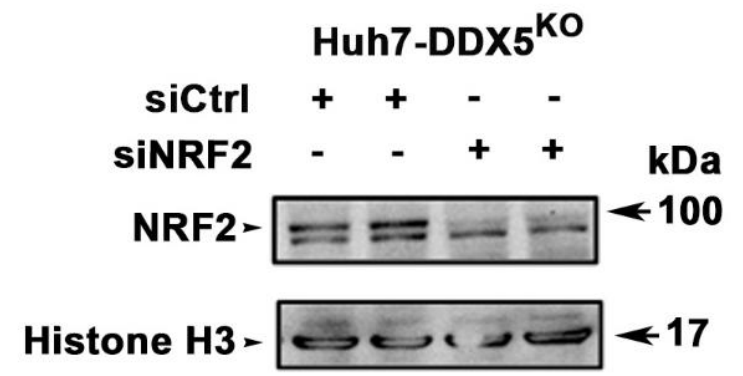

Supplement: 41419_2024_6977_MOESM2_ESM.pdf [file 41419_2024_6977_MOESM2_ESM.pdf]
